# Supplementary material for: The Effect of Biomaterials Used for Tissue Regeneration Purposes on Polarization of Macrophages
Source: PubMed Central journal article supplement (PMC4744891; doi:10.1089/biores.2015.0041), 2016-01-01

## Supplementary Appendix S1

We used the following search strategy in the Embase, and the searching strategy was modified in other databases accordingly.

('tissue adhesive'/exp OR 'adhesive agent'/de OR 'surgical mesh'/de OR 'surgical equipment'/de OR 'tissue scaffold'/de OR biomaterial/de OR (adhesive\* OR glue\* OR bioglu\* OR tachocomb\* OR bucrilate\* OR enbucrilate\* OR cyanoacryl\* OR mesh\* OR 4DDOME OR AIGISRx OR AlloDerm OR AlloMax OR 'Bard Composix EX patch' OR 'BIO-A Tissue Reinforcement prosthesis' OR CollaMend OR DermaMatrix OR Dual-Mesh OR 'Evolution P3EM' OR FasLata OR FlexHD OR FortaGen OR 'IntePro Lite' OR InteXen OR NEO-VEIL OR 'Optilene Mesh LP' OR 'Parietex composite' OR Pelvicol OR Pelvisoft OR Pelvitex OR PerFix OR 'Peri-Strips Dry' OR PeriGuard OR Permacol OR Phys-

iomesh OR Strattice OR Surgisis OR TIGR OR Timesh OR 'TiMESH light' OR Tutomesh OR Tutopatch OR Ultrapro OR Ventralex OR Veritas OR Vivosorb OR Vypro OR X-Repair OR XenMatrix OR scaffold\* OR biomaterial\* OR biocompatib\* OR Hemocompatib\* OR Haemocompatib\* OR resorbable OR (implant\* NEAR/3 integrat\*)):ab,ti) AND ('macrophage culture'/de OR 'monocyte culture'/de OR ((macrophage/exp OR 'macrophage activation'/de OR monocyte/de OR (macrophag\* OR monocyte\*):ab,ti) AND ('in vitro study'/exp OR monoculture/de OR ('in vitro' OR culture\* OR monocultur\*):ab,ti))) NOT ([Conference Abstract]/lim OR [Conference Paper]/lim OR [Review]/lim OR [Conference Review]/lim OR [Letter]/lim OR [Note]/lim OR [Editorial]/lim) AND [english]/lim

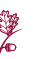

Supplement: Supp_Appendix1.pdf [file Supp_Appendix1.pdf]
